# Supplementary material for: A Qualitative Study on Prehabilitation before Total Hip and Knee Arthroplasties: Integration of Patients’ and Clinicians’ Perspectives
Source: MDPI journal article supplement (doi:10.3390/disabilities1040025), 2021-10-19
Supplement: s1 [file s1]

Archive with 1 entries (1 files):
- disabilities-1364044-supplementary.pdf
