# Supplementary material for: A Qualitative Study on Prehabilitation before Total Hip and Knee Arthroplasties: Integration of Patients’ and Clinicians’ Perspectives
Source: MDPI journal article supplement (doi:10.3390/disabilities1040025), 2021-10-19
Supplement: s1 [file s1 › disabilities-1364044-supplementary.pdf]

## Supplementary materials

**Table S1.** Interview guide used in the mixed focus group.

|                                                                                                                                                                                                                                                                                                                                                                                                                                                                                                                                                                                                                                                                                                                                                                                                                                                                                                                                                                                                                                                                                                                                                                                                                                                                                                                                                                                                                                                                                                                                                                                          |
|------------------------------------------------------------------------------------------------------------------------------------------------------------------------------------------------------------------------------------------------------------------------------------------------------------------------------------------------------------------------------------------------------------------------------------------------------------------------------------------------------------------------------------------------------------------------------------------------------------------------------------------------------------------------------------------------------------------------------------------------------------------------------------------------------------------------------------------------------------------------------------------------------------------------------------------------------------------------------------------------------------------------------------------------------------------------------------------------------------------------------------------------------------------------------------------------------------------------------------------------------------------------------------------------------------------------------------------------------------------------------------------------------------------------------------------------------------------------------------------------------------------------------------------------------------------------------------------|
| <p>1. What are or were you most concerned about going into surgery?</p> <ul style="list-style-type: none"><li>• <i>Probe:</i> Did you receive or find information on the topics you were most concerned about?</li></ul> <p>2. What do you hope, or did you hope to learn at education sessions to prepare for hip replacement?</p> <ul style="list-style-type: none"><li>• <i>Probe:</i> Is there anything else that you were hoping would have been covered at the education session? (Physical, mental, nutrition, equipment etc.)</li></ul> <p>3. [<i>Refer to flip chart</i>] These are the main pre-surgical education topics [Understanding osteoarthritis/hip precautions, goal setting, physical activity, home safety/equipment, nutrition &amp; weight management and pain management]. And then closer to the surgery date, education includes additional information on what happens in hospital and how to manage everyday activities after surgery. <b>Did you feel you received enough information on these topics?</b></p> <ul style="list-style-type: none"><li>• <i>Probe:</i> Are there other topics you would like covered?</li><li>• <i>Probe:</i> Participants in a previous focus group felt they needed more information on “mental health, pain medication, additional hospital stay details, support services and facilities, activities that can be done after surgery, timeline for recovery” <b>What are your thoughts on this?</b></li></ul> <p>4. Beyond the education sessions, did you look up any information on your own to prepare for surgery?</p> |
|------------------------------------------------------------------------------------------------------------------------------------------------------------------------------------------------------------------------------------------------------------------------------------------------------------------------------------------------------------------------------------------------------------------------------------------------------------------------------------------------------------------------------------------------------------------------------------------------------------------------------------------------------------------------------------------------------------------------------------------------------------------------------------------------------------------------------------------------------------------------------------------------------------------------------------------------------------------------------------------------------------------------------------------------------------------------------------------------------------------------------------------------------------------------------------------------------------------------------------------------------------------------------------------------------------------------------------------------------------------------------------------------------------------------------------------------------------------------------------------------------------------------------------------------------------------------------------------|

- *Probe:* What sources did you use? i.e. online

Now we are going to talk about educational delivery. We are interested in exploring different ways educational materials might be presented to those about to undergo surgery.

1. How do you learn best?

- *Probe:* 1:1, group, written materials, lecture, activity-based, video, or online.
- When you want to learn something new how do you do that?

2. Do you ever use the internet or go online for learning purposes?

- *Probe:* Which tech are you most likely to use if you go online i.e. smart phone, tablet?
- *Probes:* What are the obstacles? What are the benefits?

3. Do you think it would be helpful to have education available online to help you prepare for surgery?

- *Probes:* And some cons?

**Table 2.** The demographic information of patients with hip and knee OA.

|                            |                                                  | <b>Hip OA</b> | <b>Knee OA</b> |
|----------------------------|--------------------------------------------------|---------------|----------------|
| <b>Age</b>                 |                                                  | 66.62         | 68.17          |
| <b>Surgery</b>             | After surgery                                    | 27            | 10             |
|                            | Before surgery                                   | 19            | 5              |
| <b>Gender</b>              | Female                                           | 32            | 8              |
|                            | Male                                             | 14            | 6              |
| <b>Living Situation</b>    | Live alone                                       | 23            | 5              |
|                            | Live with a (healthy) spouse/partner             | 21            | 8              |
|                            | Live with a spouse/partner who I provide care to | -             | -              |
|                            | Live with other family member                    | -             | 1              |
| <b>Gross Annual Income</b> | Less than \$14,999                               | 2             | -              |
|                            | \$15,000-\$44,999                                | 12            | 1              |
|                            | \$45,000-\$74,999                                | 10            | 2              |
|                            | Greater than \$75,000                            | 10            | 8              |
|                            | Prefer not to answer                             | 10            | 3              |
|                            | N/A                                              | -             |                |
| <b>Employment</b>          | Unemployed                                       | 3             | -              |
|                            | On disability                                    | 2             | 1              |
|                            | Sick Leave                                       | 1             | -              |
|                            | Employed part-time                               | 4             | -              |

|  |                    |    |   |
|--|--------------------|----|---|
|  | Employed full-time | 9  | 5 |
|  | Semi-retired       | 1  | - |
|  | Retired            | 21 | 8 |
